# Supplementary material for: An observational study of the effectiveness of practice guideline implementation strategies examined according to physicians' cognitive styles
Source: Springer Nature journal article supplement (doi:10.1186/1748-5908-2-41), 2007-12-01
Supplement: Additional file 1 [file 1748-5908-2-41-s1.doc]

CONCORDANCE SCORING FOR KNOWLEDGE-BASED STRATEGIES

|  | | | | Seeker | Receptive | Traditional | Pragmatist |
| --- | --- | --- | --- | --- | --- | --- | --- |
| Evidence-Based | Brief | Written | Influential | 4 | 5 | 2 | 4 |
| Non-influential | 4 | 4 | 0 | 3 |
| Oral | Influential | 4 | 5 | 2 | 5 |
| Non-influential | 4 | 4 | 0 | 4 |
| Detailed | Written | Influential | 5 | 4 | 0 | 1 |
| Non-influential | 5 | 3 | -1 | 0 |
| Oral | Influential | 5 | 4 | 1 | 0 |
| Non-influential | 5 | 3 | -1 | -1 |
| Authority-Based | Brief | Written | Influential | 0 | 1 | 3 | 4 |
| Non-influential | 0 | 0 | 0 | 3 |
| Oral | Influential | 0 | 1 | 4 | 5 |
| Non-influential | 0 | 0 | 0 | 4 |
| Detailed | Written | Influential | 0 | 2 | 4 | 1 |
| Non-influential | 0 | 0 | 1 | 0 |
| Oral | Influential | 0 | 2 | 5 | 0 |
| Non-influential | 0 | 0 | 2 | -1 |

# CONCORDANCE SCORING FOR BEHAVIOR-BASED STRATEGIES

|  | | | | Seeker | Receptive | Traditional | Pragmatist |
| --- | --- | --- | --- | --- | --- | --- | --- |
| Organiza-tional | Make it easier | Barrier removal | Based on thorough evaluation | 5 | 5 | 5 | 5 |
| Based on casual evaluation | 2 | 2 | 2 | 3 |
| No evaluation | 1 | 1 | 1 | 2 |
| Assistive mechanisms | | 5 | 5 | 2 | 3 |
| Make it harder: set up barriers | | | 1 | 3 | 2 | 5 |
| Motivational | Make it easier through incentives | Individualized | | 3 | 4 | 3 | 5 |
| Group | | 1 | 2 | 1 | 3 |
| Penalties | Individualized | | 0 | 3 | 2 | 4 |
| Group | | 0 | 1 | 1 | 3 |
| Performance  Feedback | Individualized | | 0 | 4 | 4 | 3 |
| Group | | 0 | 2 | 1 | 1 |
